# Supplementary material for: Tailoring surface morphology on anatase TiO2 supported Au nanoclusters: implications for O2 activation
Source: Royal Society of Chemistry journal article supplement (doi:10.1039/d4na00744a), 2024-01-01
Supplement: d4na00744a1.pdf [file d4na00744a1.pdf]

**Supplementary Information**

**Tailoring surface morphology on anatase TiO<sub>2</sub> supported Au nanoclusters: implications for O<sub>2</sub> activation**

Muhammed Fasil Puthiyaparambath, Julian Ezra Samuel, and Raghu Chathanathi\*

Department of Physics

National Institute of Technology Calicut, Calicut, Kerala, 673601, India

\*Corresponding author: [raghuc@nitc.ac.in](mailto:raghuc@nitc.ac.in)

## S1: Hydration energy calculations

To find out the surface energy of the hydrated surface ( $\gamma'$ ), we used the following expression  $\gamma' = \gamma + nE/A$ , where  $\gamma$ ,  $n$ ,  $E$ , and  $A$  are the surface energy of the clean surface, no. of H<sub>2</sub>O molecule, the adsorption energy of the water molecule and area of the slab respectively.

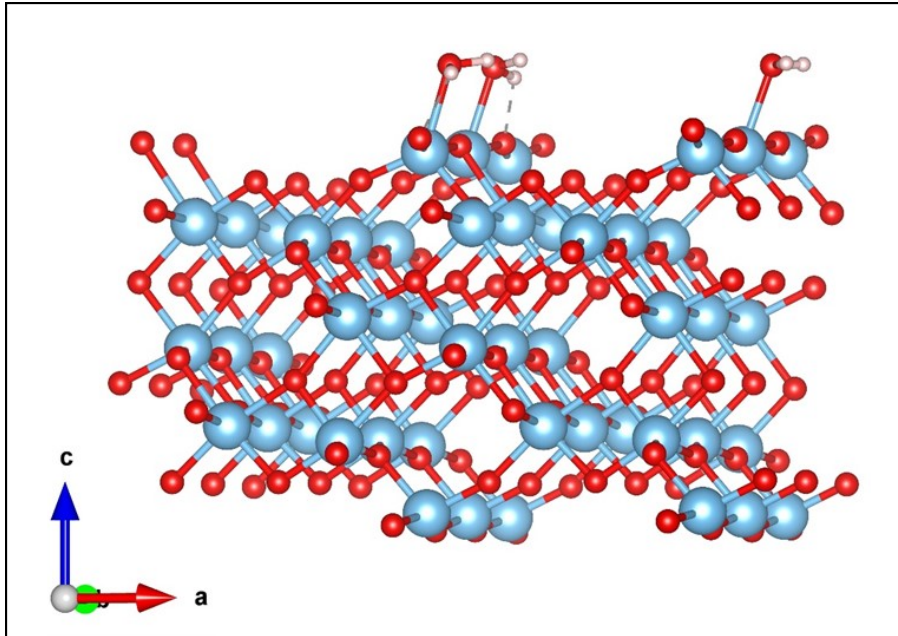

**Figure S1.** Optimized configuration of hydrated (103) surface

The values obtained for hydration surface energy as per the above equation for the (101) surface are 0.35, 0.49 and 0.61 J/m<sup>2</sup>, while for the (103) surface, they are 0.67, 0.75 and 0.85 J/m<sup>2</sup> for the 1/6, 1/3 and 1/2 monolayer (ML) coverage, respectively. Notably, the decrease in hydration surface energies is greater for (103) compared to (101) at all values of coverage considered here, indicating that hydration stabilizes the (103) surface more effectively.

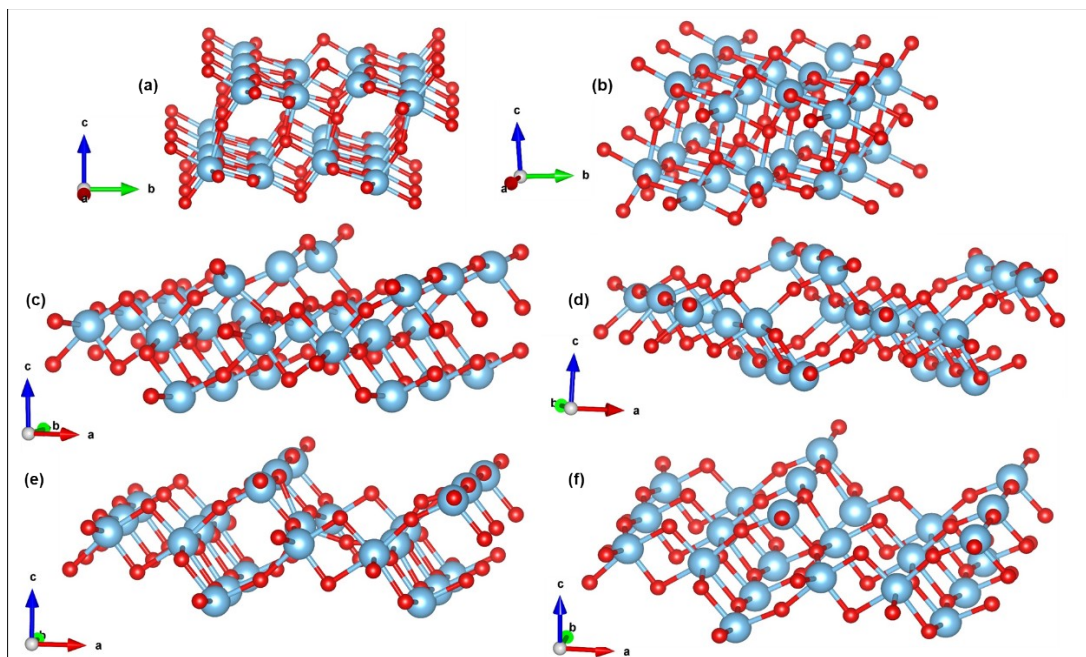

**Figure S2.** Optimized geometries of reduced (101) (a)  $V_{2c}$  (b)  $V_{3c}$  and (103) (c)  $V_{2c1}$  (d)  $V_{2c2}$  (e)  $V_{2c3}$  (f)  $V_{3c1}$

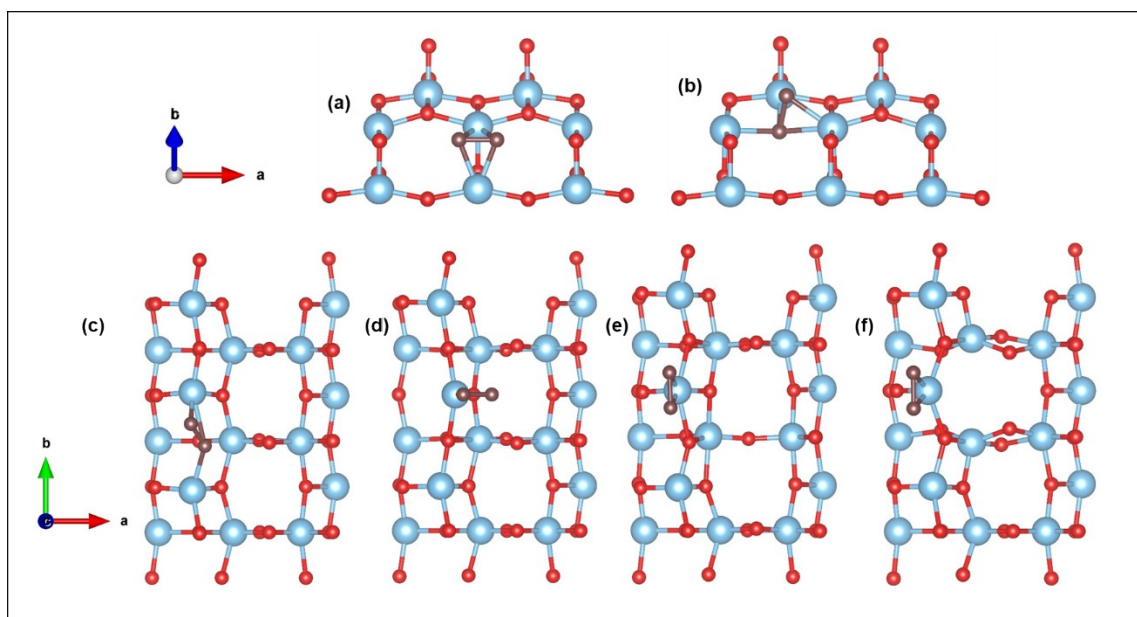

**Figure S3.** Optimized geometries of  $O_2$  adsorption on reduced (101) (a)  $V_{2c}$  (b)  $V_{3c}$  and (103) (c)  $V_{2c1}$  (d)  $V_{2c2}$  (e)  $V_{2c3}$  (f)  $V_{3c1}$

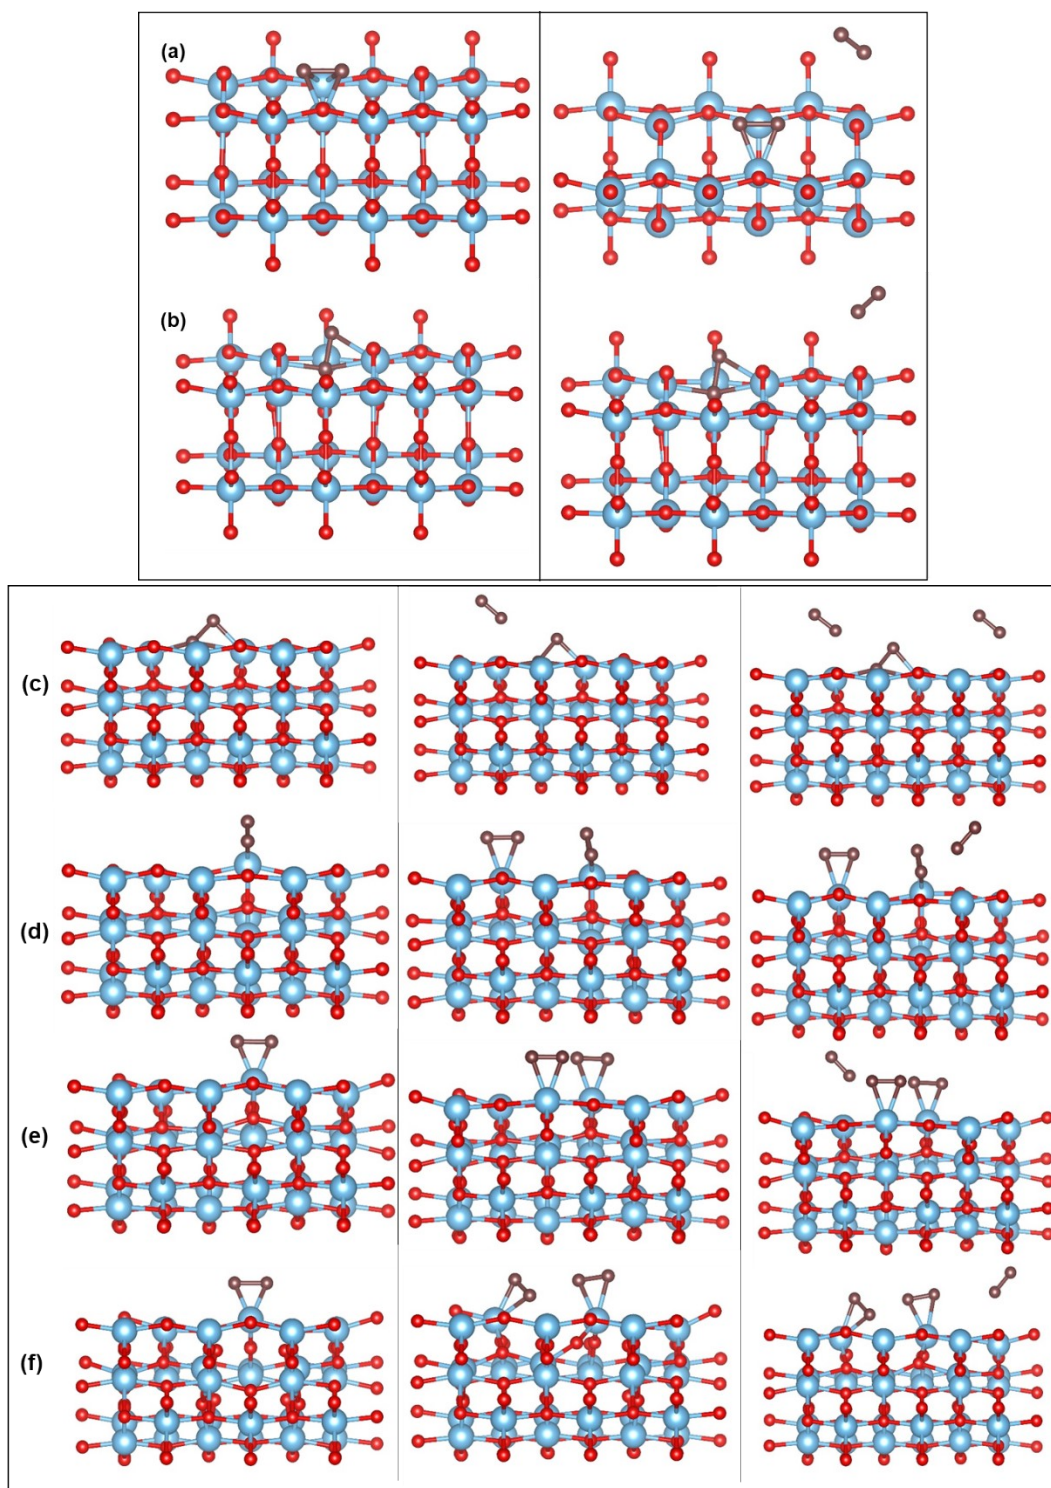

**Figure S4.** Coverage studies on (101) and (103) TiO<sub>2</sub> surfaces for (a) O<sub>2c</sub> (b) O<sub>3c</sub> (c) O<sub>2c1</sub> (d) O<sub>2c2</sub> (e) O<sub>2c3</sub> (f) O<sub>3c1</sub>



## S2: CI-NEB calculations

We calculated the barrier using CI-NEB to determine the energy barrier for diffusion of the dissociated oxygen atom into the lattice. The barrier for  $V_{2c}$  and  $V_{3c}$  for the  $\text{TiO}_2$  (101) surface is zero. Similarly, the  $V_{2c1}$  (103) surface also follows a barrierless pathway. However,  $V_{2c2}$ ,  $V_{2c3}$  and  $V_{3c1}$  of (103) have a non-zero barrier. The initial states (IS) and final states (FS) were obtained after structural relaxation. At the transition state (TS) the O-O bond lengths are approximately 2.49 Å, 3.78 Å and 3.36 Å for  $V_{2c2}$ ,  $V_{2c3}$  and  $V_{3c1}$ , respectively. These configurations have a barrier of 1.15 eV, 1.98 eV and 0.78 eV. For  $V_{3c1}$ , the reaction is exothermic, while the remaining two configurations are endothermic.

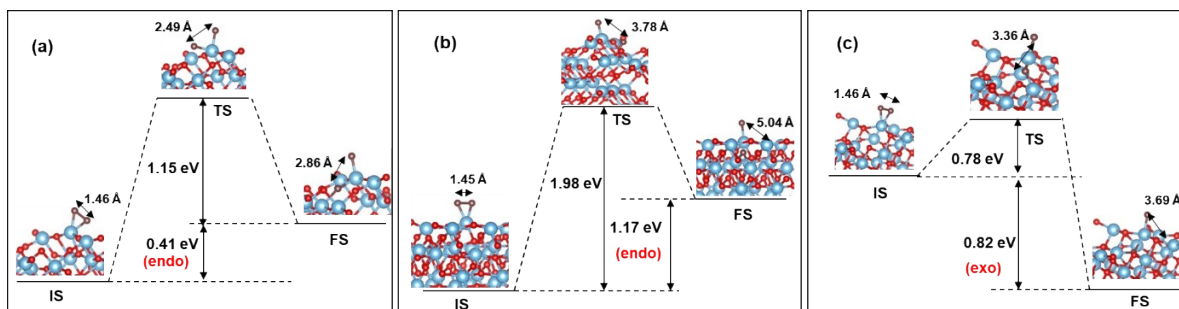

**Figure S5.** The diffusion barrier for lattice trapping of  $\text{O}_2$  on (a)  $V_{2c2}$  (b)  $V_{2c3}$  (c)  $V_{3c1}$

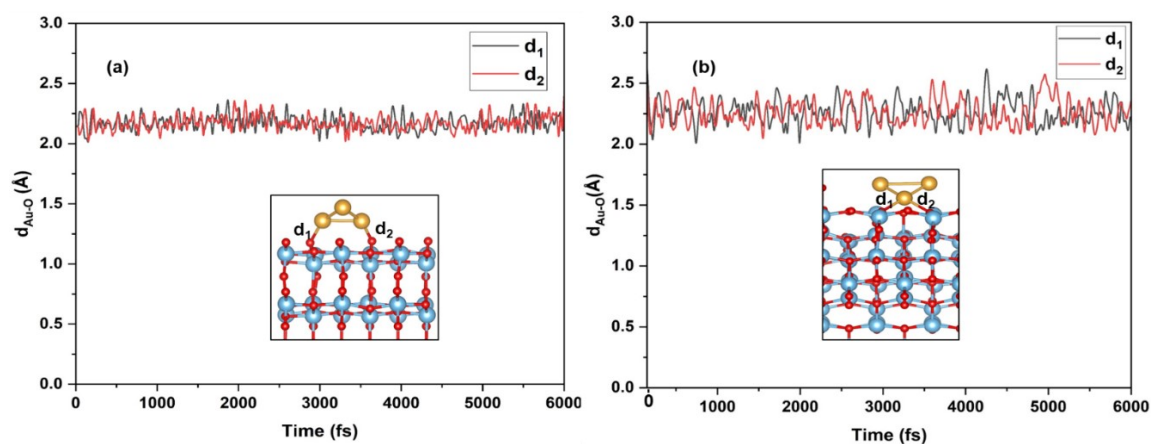

**Figure S6.** Time evolution of  $d_{\text{Au-O}_{2c}}$  ( $d_1$  and  $d_2$ ) for Au<sub>3</sub> supported on (a) (101) and (b) (103). The time trace shows the distance between Au and the two-coordinated oxygen atom of TiO<sub>2</sub>. The time traces show that the distance Au-O<sub>2c</sub> is more or less the same at 0K and 300K.

**Table S1:** Adsorption energy per O<sub>2</sub> molecule on (101) and (103) Au<sub>3</sub>/TiO<sub>2</sub>: a comparison.

| No. of O <sub>2</sub> molecules | (101)                 |                                   |        | (103)                 |                                   |        |
|---------------------------------|-----------------------|-----------------------------------|--------|-----------------------|-----------------------------------|--------|
|                                 | $E_{\text{ads}}$ (eV) | $d_{\text{O-O}}$ ( $\text{\AA}$ ) | $Q$  e | $E_{\text{ads}}$ (eV) | $d_{\text{O-O}}$ ( $\text{\AA}$ ) | $Q$  e |
| 1                               | -0.85                 | 1.32                              | 0.45   | -1.66                 | 1.43                              | 0.78   |
| 2                               | -0.55                 | 1.29                              | 0.30   | -1.10                 | 1.37                              | 0.52   |
| 3                               | -0.44                 | 1.27                              | 0.20   | -0.83                 | 1.33                              | 0.41   |
